# Supplementary material
Source: MDPI journal article supplement (https://www.mdpi.com/2624-5175/5/4/41)
Supplement: s1 [file s1]

**Table S1.** Illuminance, correlated color temperature and alpha-opic illuminance of light conditions in this study

|              | Photopic<br>illuminance<br>[lx] | Correlated<br>color<br>temperature<br>[K] | Alpha-opic equivalent daylight (D65) illuminance [lx] |             |             |          |           |
|--------------|---------------------------------|-------------------------------------------|-------------------------------------------------------|-------------|-------------|----------|-----------|
|              |                                 |                                           | S-cone-opic                                           | M-cone-opic | L-cone-opic | Rhodopic | Melanopic |
| Dim light    | 2.6                             | 2752                                      | 0.6                                                   | 2.1         | 2.7         | 1.4      | 1.2       |
| Bright light | 8004                            | 4103                                      | 4989                                                  | 7054        | 7966        | 5506     | 4951      |

All measurements were performed vertically at the sitting subject’s eye level.
